# Supplementary material
Source: Springer Nature journal article supplement (https://www.springermedizin.de/resource/supplementary/13051_2011_220_MOESM6_ESM.pdf/9670188)

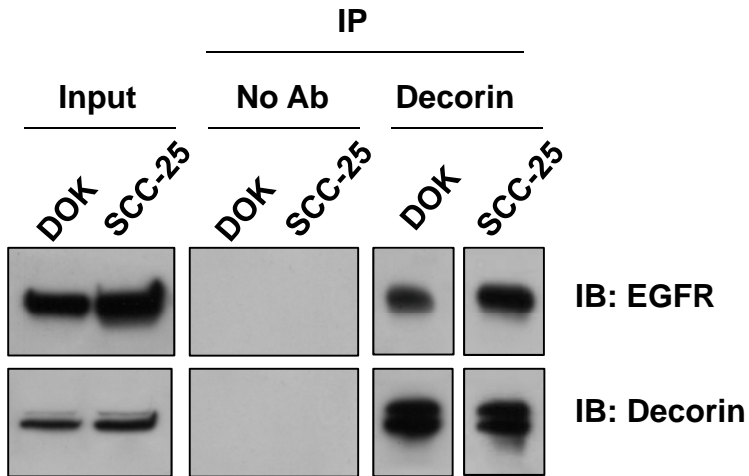

Supplement: MOESM6 [file 9670188]
